# Supplementary material for: Mutations in the non-catalytic polyproline motif destabilize TREX1 and amplify cGAS-STING signaling
Source: PubMed Central journal article supplement (PMC10802300; doi:10.1101/2024.01.04.574136), 2024-01-04
Supplement: NIHPP2024.01.04.574136v1-supplement-1.pdf [file NIHPP2024.01.04.574136v1-supplement-1.pdf]

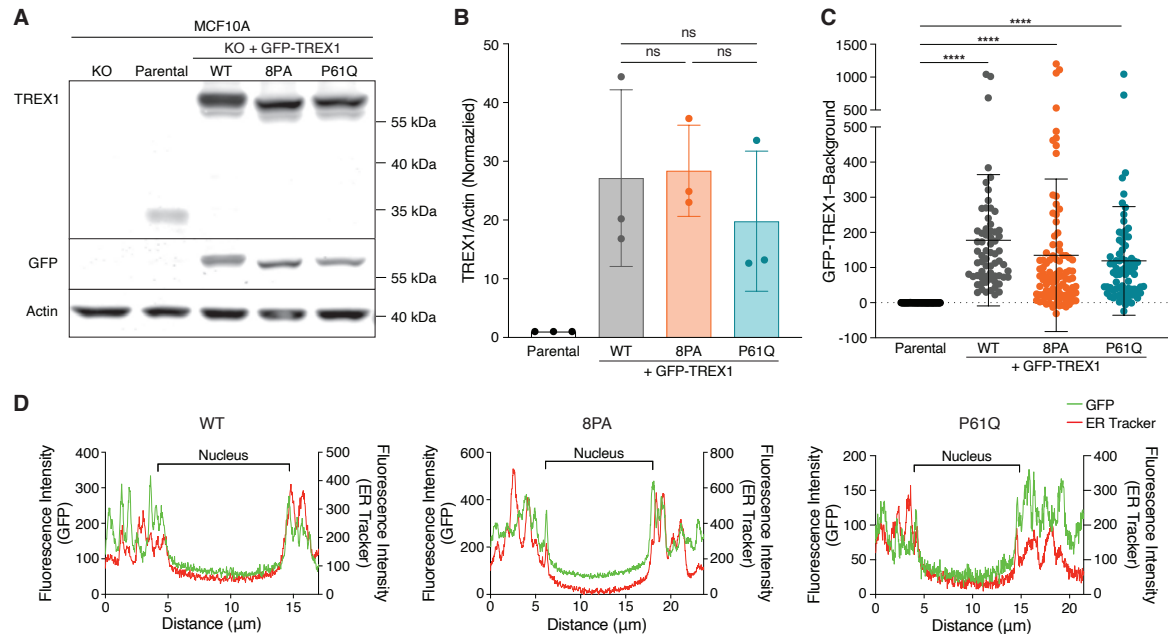

175

176 **Figure S1. Overexpressed TREX1 mutants localize to the ER. A.** Representative

177 immunoblot of MCF10A *TREX1* KO cells reconstituted with the indicated GFP-TREX1, using

178 anti-TREX1, anti-GFP, and anti-actin antibodies. **B.** Quantification of TREX1 immunoblot signal

179 normalized to actin; mean  $\pm$  s.d.,  $n = 3$ , ns = not significant, one-way ANOVA ( $p = 0.0401$ ). For

180 each replicate, the parental TREX1/Actin signal was set to one. **C.** Quantification of GFP-

181 TREX1 signal in the indicated cells as in Fig. 1G; mean  $\pm$  s.d.,  $n = 5$  experiments, \*\*\*\* $p <$

182 0.0001, one-way ANOVA ( $p < 0.0001$ ). **D.** Line profile analysis of the indicated cells as in Fig.

183 1G. Position of the nucleus was determined using the line profile signal of the DAPI channel.

184 Background signal was subtracted from all points.

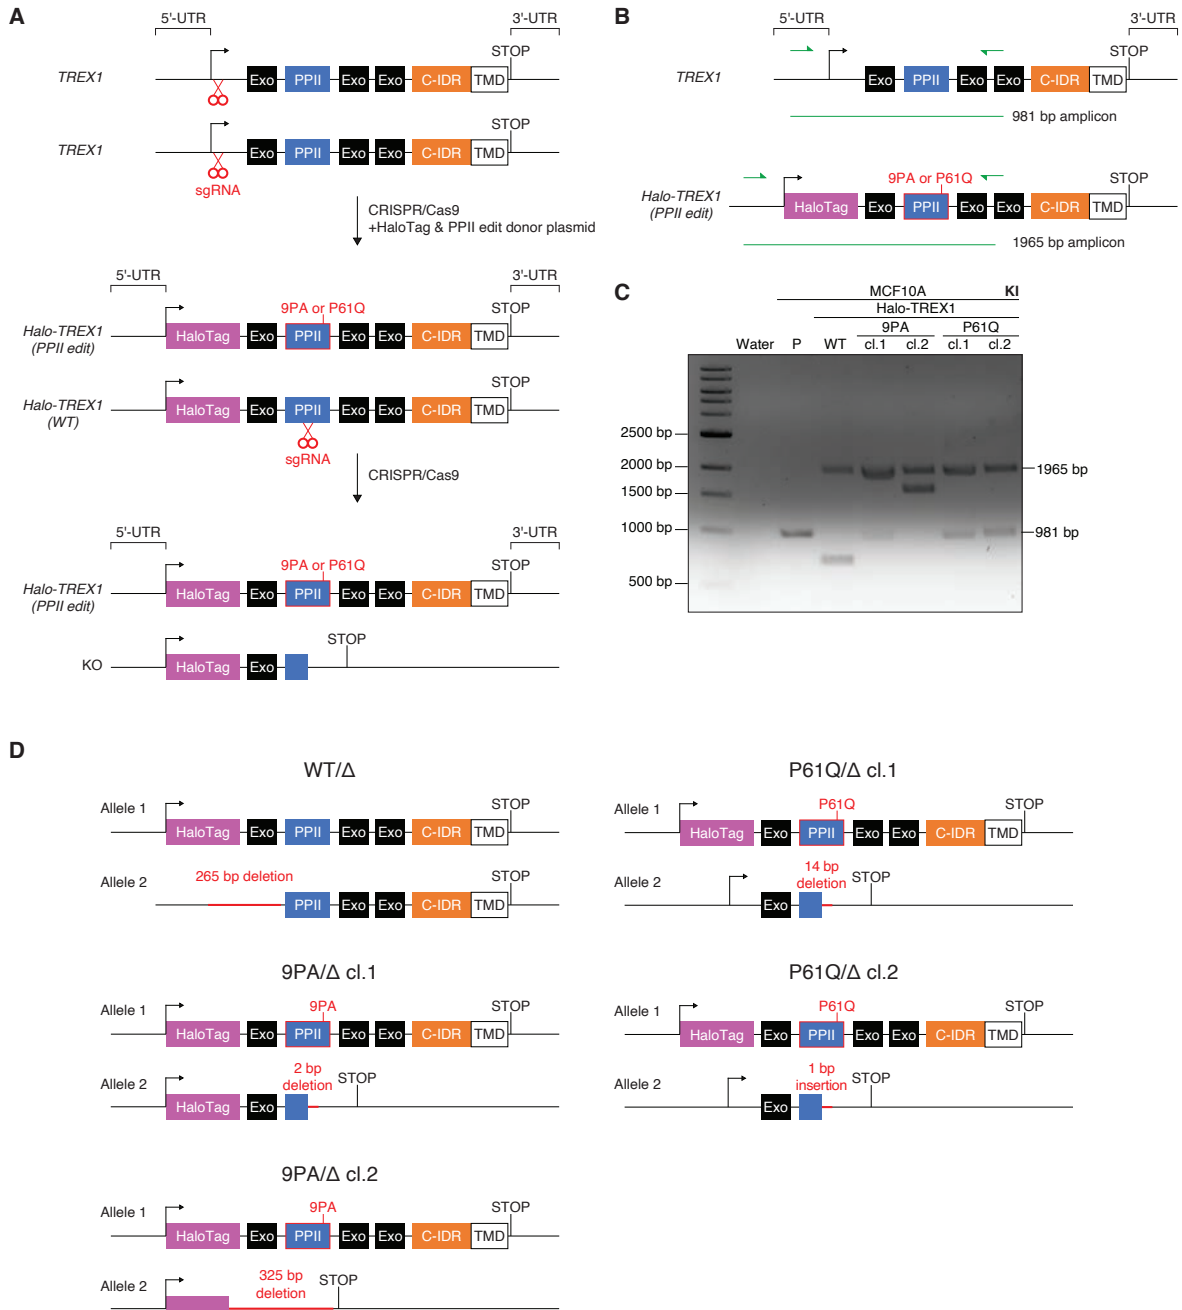

246

247 **Figure S2. Generation of *TREX1* knock-in mutations. A.** Representative schematic of *TREX1*

248 gene editing protocol. Briefly, an N-terminal sgRNA and a HaloTag donor plasmid harboring a

249 PPII edit in its downstream homology arm were nucleofected into MCF10A cells. Sanger

250 sequencing revealed that HaloTag insertion occurs more frequently than incorporation of the

251 PPII edit, often yielding two Halo-tagged alleles, one with the desired PPII edit. A second round

252 of gene editing was carried out using a sgRNA specific for unedited PPII, knocking out the  
253 unedited allele while leaving the PPII-edited, Halo-tagged allele intact. **B.** Schematic of PCR  
254 primers and amplicons used to validate knock-in cell lines. **C.** PCR gel of all knock-in cell line  
255 clones used in this manuscript. All bands were excised and Sanger sequenced to validate  
256 expected gene edits. **D.** Schematic detailing the precise edits present in all clones.

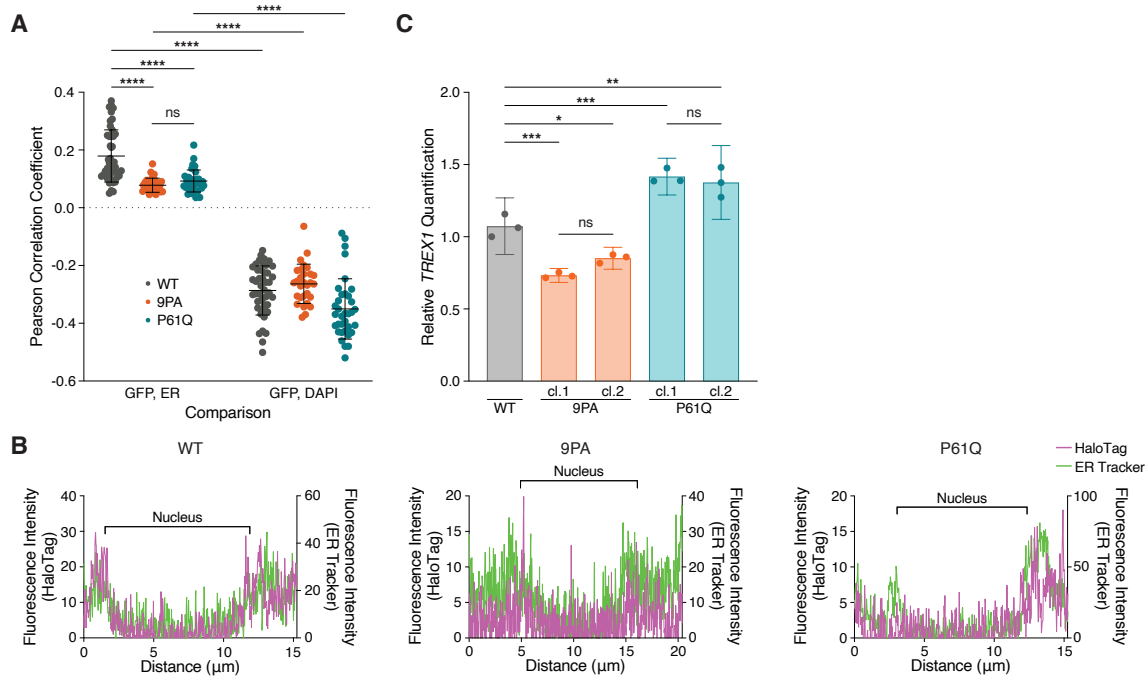

274

275 **Figure S3. Mutations in PPII do not interfere with TREX1 transcription or localization. A.**

276 Pearson correlation coefficients of the indicated cells as in Fig. 3C; mean  $\pm$  s.d.,  $n = 5$

277 experiments, \*\*\*\* $p < 0.0001$ , ns = not significant, two-way ANOVA (interaction  $p < 0.0001$ ,

278 comparison pair  $p < 0.0001$ , genotype  $p < 0.0001$ ). **B.** Line profile analysis as indicated in Fig.

279 3C. Extent of the nucleus was determined using the line profile signal of the DAPI channel.

280 Background signal was subtracted from all points. **C.** RT-qPCR of *TREX1* in the indicated cells

281 following mock transfection; mean  $\pm$  s.d.,  $n = 3$ , \* $p < 0.05$ , \*\* $p < 0.01$ , \*\*\* $p < 0.001$ , ns = not

282 significant, one-way ANOVA ( $p < 0.0001$ ).
